# 1 Electromembrane extraction and mass spectrometry for 2 liver organoid drug metabolism studies

3  
4 Frøydis Sved Skottvoll<sup>a,b</sup>, Frederik Hansen<sup>c</sup>, Sean Harrison<sup>b</sup>, Ida Sneis Boger<sup>a,b</sup>, Ago  
5 Mrsa<sup>a,b</sup>, Magnus Saed Restan<sup>c</sup>, Matthias Stein<sup>d</sup>, Elsa Lundanes<sup>a</sup>, Stig Pedersen-  
6 Bjergaard<sup>c,e</sup>, Aleksandra Aizenshtadt<sup>b</sup>, Stefan Krauss<sup>b,i</sup>, Gareth Sullivan<sup>b,f</sup>, Inger Lise  
7 Bogen<sup>g,h</sup>, Steven Ray Wilson<sup>a,b\*</sup>

8  
9 <sup>a</sup> Department of Chemistry, University of Oslo, P.O. Box 1033, Blindern, NO-0315  
10 Oslo, Norway

11 <sup>b</sup> Hybrid Technology Hub-Centre of Excellence, Institute of Basic Medical Sciences,  
12 Faculty of Medicine, University of Oslo, P.O. Box 1112 Blindern, NO-0317 Oslo,  
13 Norway

14 <sup>c</sup> Department of Pharmacy, University of Oslo, P.O. Box 1068 Blindern, NO-0316  
15 Oslo, Norway

16 <sup>d</sup> Institute of Medicinal and Pharmaceutical Chemistry, TU Braunschweig,  
17 Beethovenstr. 55, DE-38106 Braunschweig, Germany

18 <sup>e</sup> Department of Pharmacy, Faculty of Health and Medical Sciences, University of  
19 Copenhagen, Universitetsparken 2, 2100 Copenhagen, Denmark

20 <sup>f</sup> Department of Pediatric Research, Oslo University Hospital and University of Oslo,  
21 PO Box 1112 Blindern, 0317 Oslo, Norway

22 <sup>g</sup> Section for Drug Abuse Research, Department of Forensic Sciences, Oslo  
23 University Hospital, P.O. Box 4950 Nydalen, NO-0424 Oslo, Norway

24 <sup>h</sup> Institute of Basic Medical Sciences, Faculty of Medicine, University of Oslo, P.O.  
25 Box 1103 Blindern, NO-0317 Oslo, Norway

26 <sup>i</sup> Department of Immunology and Transfusion Medicine, Oslo University Hospital,  
27 P.O. Box 1110 Blindern, 0317, Oslo, Norway.

28  
29 \*Corresponding author: [stevenw@kjemi.uio.no](mailto:stevenw@kjemi.uio.no), +47 97010953.  
30 <https://orcid.org/0000-0002-9755-1188>

31

32

## 33 **Abstract**

34 Liver organoids are emerging tools for precision drug development and toxicity  
35 screening. We demonstrate that electromembrane extraction (EME) based on  
36 electrophoresis across an oil membrane is suited for segregating selected organoid-  
37 derived drug metabolites prior to mass spectrometry (MS)-based measurements.  
38 EME, allowed drugs and drug metabolites to be separated from cell medium  
39 components (albumin, etc.) that could interfere with subsequent measurements.  
40 Multi-well EME (Parallel-EME) holding 100  $\mu$ L solutions allowed for simple and  
41 repeatable monitoring of heroin phase I metabolism kinetics. Organoid Parallel-EME  
42 extracts were compatible with ultrahigh-performance liquid chromatography (UHPLC)  
43 used to separate the analytes prior to detection. Taken together, liver organoids are  
44 well-matched with EME followed by MS-based measurements.

45

46

47 **Keywords:** Organoids; Drug metabolism; Electromembrane extraction; Liquid  
48 chromatography; Mass spectrometry

49

50

51

52

53

54

55

56

57

58

59

## 60 Introduction

61 The process of drug development is known to be time consuming and bear financial  
62 uncertainties<sup>1,2</sup>. It is estimated that from 5,000-10,000 new molecular entities, only  
63 one new drug will enter the market<sup>3</sup>. The advancement of this one drug from concept  
64 to market takes approximately 15 years and a cost over \$ 1 billion, as well as the use  
65 of human resources, research skills, and technological expertise<sup>3</sup>. As the majority of  
66 drug candidates are rejected late in the process and during clinical trials<sup>3</sup>, one  
67 approach to reducing the assets put into the drug development may be to reject  
68 possible drug candidates early in the development process, i.e. during preclinical  
69 testing. This may be done by developing or utilizing in vitro models that adequately  
70 recapitulate the human in vivo response.

71

72 Organoids are three-dimensional tissue models derived from primary tissues,  
73 embryonic stem cells or induced pluripotent stem cells (iPSC)<sup>4-6</sup>. These “mini” organs  
74 are emerging tools for studying human development and disease, serving as  
75 alternatives to cell cultures and animal models in drug development<sup>7,8</sup>. A wide variety  
76 of organoids are being developed and studied, e.g. brain, heart, tumor tissue and  
77 liver<sup>9-12</sup>. Liver organoids can be valuable models for studying drug metabolism and  
78 toxicity<sup>13</sup> (**Figure 1A**), perhaps even in a personalized fashion, as organoids can be  
79 derived from the cells of a patient<sup>14,15</sup>.

80

81 Drug metabolism is a significant determinant of drug clearance and an indirect  
82 determinant of the clinical efficacy and toxicity of drugs<sup>16</sup>. Thus, the mapping of the  
83 biotransformation pathway of drugs is crucial in the early part of the drug  
84 development process<sup>17</sup>. Clinical studies of xenobiotics in humans are subjected to  
85 constraints concerning ethical aspects. Several in vitro model systems have been  
86 developed to recapitulate human functions from the molecular level to the cellular,  
87 tissue, organ, or whole organism level. The most commonly used in vitro models for  
88 drug metabolism studies include subcellular fractions e.g. human liver microsomes  
89 (HLMs), S9 fractions and human hepatocytes. However, current in vitro models have  
90 some disadvantages. For example HLMs do not represent a complete course of  
91 metabolism as they lack soluble phase II enzymes<sup>16</sup>. Additionally, higher  
92 biotransformation rates are obtained in HLMs compared to humans, most likely

93 because of the enriched enzyme concentrations and the absence of competing  
94 enzymes<sup>17</sup>. Also, animal models can have shortcomings, and have frequently been  
95 shown to lead to wrong predictions of drug interaction and toxicity in humans<sup>18</sup>.

96

97 For both in vitro and in vivo models, drug metabolism studies are very often  
98 performed utilizing liquid chromatography-mass spectrometry (LC-MS). Essentially,  
99 the mass spectrometer (MS) can measure the drugs and their metabolites with a high  
100 degree of selectivity. Prior to MS measurements, the compounds in the sample are  
101 separated by the LC system, allowing for increased sensitivity and selectivity.

102

103 There are few studies utilizing LC-MS for drug metabolism measurements of  
104 organoids<sup>19-21</sup>. To the authors knowledge, there are currently no studies dedicated to  
105 demonstrating the potential of drug metabolism studies with liver organoids and LC-  
106 MS<sup>22</sup>. The key focus of this study is to show the potential of using liver organoids and  
107 LC-MS measurements as a methodology for drug metabolism studies. To ensure an  
108 efficient combination of organoids, LC-MS and drug metabolism, several challenges  
109 must be addressed. The amounts of organoids can (depending on the production  
110 method) be quite limited per sample, requiring efficient sample preparation prior to  
111 analysis. It is also highly desirable that drug metabolism studies with organoids can  
112 be upscaled, which is difficult to combine with more standard sample preparation  
113 approaches which include centrifugation steps and manual pipetting (**Figure S-1A**).  
114 In addition, liver organoids are grown in complex medium (e.g. can contain 10 % fetal  
115 bovine serum) requiring a thorough sample clean-up prior to LC-MS analysis. For  
116 extracting drugs, and the metabolites produced by organoids, we have applied  
117 electromembrane extraction (EME, **Figure 1B** and **Figure S-1B**). In EME, an oil  
118 immobilized in the pores of a porous membrane (supported liquid membrane, SLM)  
119 is used to extract analytes from a cell medium (donor solution) to a protein free MS  
120 compatible acceptor solution. For the process, both aqueous compartments are pH-  
121 adjusted to facilitate analyte ionization, and voltage is applied across the SLM. EME  
122 is therefore essentially an electrophoretic migration of ionized analytes across an oil  
123 membrane<sup>23,24</sup>. Extraction selectivity is determined by both the partitioning of  
124 analytes into the SLM, and the polarity and magnitude of the applied voltage. High  
125 clean-up efficiency of target analytes can thus be achieved, and EME is highly  
126 successful separating small-molecule drug substances from biological matrix

127 substances, including salts, lipids, phospholipids, proteins, and blood cells<sup>24,25</sup>. Such  
128 clean-up is highly important prior to liquid chromatography-mass spectrometry to  
129 avoid ion suppression or enhancement. EME has recently advanced to the 96-well  
130 plate format<sup>26-28</sup> (Parallel-EME), and chip systems<sup>29,30</sup>. Considering its documented  
131 traits regarding simple sample clean-up, we focus on using EME for organoids, which  
132 can be costly and limited in availability.

133

134 As a model system to show the potential of the methodology, we study the phase I  
135 metabolism of heroin to 6-monoacetylmorphine (6-MAM) and morphine (**Figure 1C**),  
136 as heroin liver metabolism is highly established, both with regards to the metabolizing  
137 enzymes<sup>31-33</sup> (e.g. human liver carboxylesterase 1 and 2, hCE1 and hCE2), and the  
138 resulting metabolites. With the here presented experiments, we have shown proof of  
139 concept that liver organoids are EME compatible, and evaluate the advantages and  
140 challenges of Parallel-EME/organoid/MS-based analysis for drug metabolism.

141

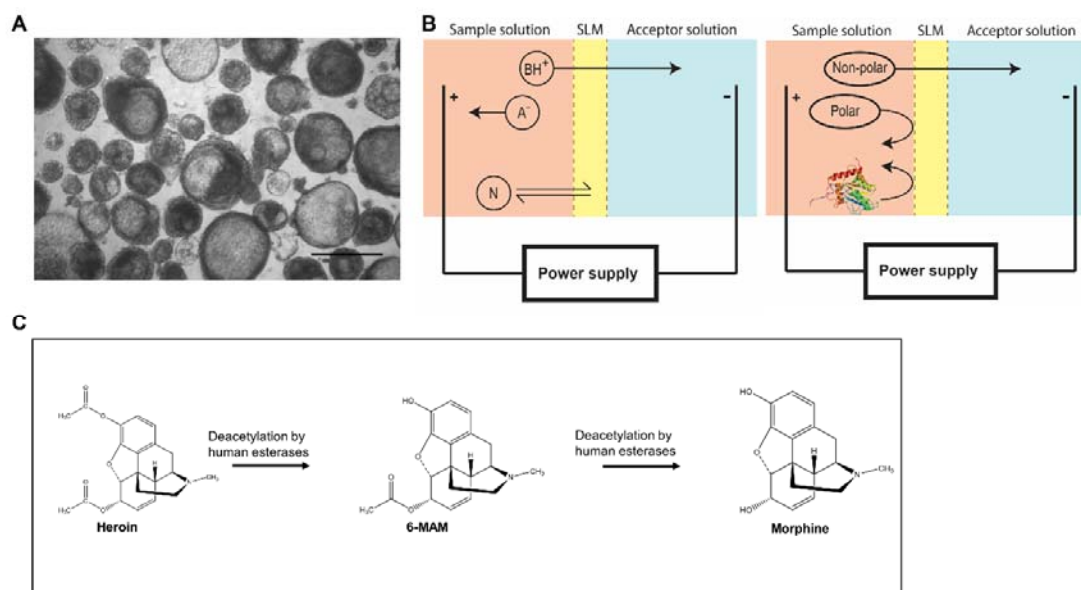

142

143 **Figure 1.** (A) Light microscope picture of iPSC derived liver organoids used in this study, scale bar  
144 500  $\mu\text{m}$ . (B) EME principle. Charged analytes migrate from the sample solution across the SLM and  
145 into the acceptor solution. Extraction selectivity is obtained by voltage polarity and partitioning into and  
146 through the SLM. Polar molecules and macromolecules are effectively discriminated from extraction  
147 by the hydrophobic SLM. (C) Illustration of well-documented liver phase I metabolism of heroin  
148 undergoing deacetylation to 6-MAM and morphine by human esterases (e.g. human liver  
149 carboxylesterase 1 and 2, hCE1 and hCE2).

150

## 151 **Experimental Section**

152

### 153 **Chemicals and Solutions**

154 2-Nitrophenyl octyl ether (NPOE), 2-nitrophenyl pentyl ether (NPPE), bis (2-  
155 ethylhexyl) hydrogen phosphite (DEHPi), bis(2-ethylhexyl) phosphate (DEHP),  
156 sodium hydroxide, ammonium formate (>99%), formic acid (FA, reagent grade 95%),  
157 L-ascorbic acid-2 phosphate (AAP) were purchased from Sigma Aldrich (St. Louis,  
158 MO, USA). LC-MS grade water and acetonitrile (ACN) was purchased from VWR  
159 (Radnor, PA, US). Chromasolv methanol (LC-MS grade) was from Honeywell Riedel-  
160 de Haën (Seelze, Germany). Heroin HCl, 6-MAM HCl and morphine were purchased  
161 from Lipomed AG (Arllesheim, Switzerland). Heroin-d9, 6-MAM-d6 and morphine-d3  
162 were purchased from Cerilliant (Austin, TX, USA). Unless otherwise stated, the water  
163 used was type 1 water purified by a Milli-Q® water purification system from Merck  
164 Millipore (Billerica, MA, USA).

165

166 The 5 mM and 10 mM ammonium formate buffer (*w/v*) was made by dissolving  
167 ammonium formate in LC-MS grade water followed by pH adjustment by the addition  
168 of FA to pH 3.1. A freshly made stock solution of 1 mM heroin HCl in 0.9% NaCl was  
169 made prior to each organoid experiment (stored at 4 °C), and was also used to  
170 prepare heroin calibration solutions. A stock solution of 6-MAM and morphine was  
171 prepared in 5 mM ammonium formate buffer pH 3.1 at a concentration of 50 µM each  
172 and stored at 4 °C. Two stock solutions of the internal standards heroin-d9, 6-MAM-  
173 d6 and morphine-d3 were prepared in 5 mM ammonium formate buffer pH 3.1 with  
174 analyte concentration of 1.5 µM each and 3 µM each, respectively, and stored at 4  
175 °C.

176

### 177 **Liver organoid differentiation from induced pluripotent stem cells**

178 The iPSC cell line HPSI0114i-vabj\_3 (Wellcome Trust Sanger Institute,  
179 Cambridgeshire, UK) was differentiated toward liver organoids using media from  
180 protocol by Ang et al.<sup>34</sup>. Briefly, the HPSI0114i-vabj\_3 iPSC line was differentiated  
181 toward definitive endoderm in Iscove's Modified Dulbecco's Medium/F12 medium  
182 (Thermo Fisher Scientific, Waltham, MA, USA) containing 3 µM CHIR99021  
183 (STEMCELL Technologies, Vancouver, Canada), 50 nM PI-103 from Bio-Techne Ltd.

184 (Abingdon, United Kingdom) and 100 ng/mL activin A (PeproTech, Cranbury, NJ,  
185 USA) for one day and 100 ng/mL activin A for 2 more days. The definitive endoderm  
186 cells were subsequently treated with 1  $\mu$ M A8301 (Bio-Techne Ltd.), 10 ng/mL FGF2  
187 (PeproTech), 30 ng/mL BMP4 (PeproTech), and 2  $\mu$ M all-trans retinoic acid (Sigma  
188 Aldrich) for one day, then with 10 ng/mL FGF2, 30 ng/mL BMP4, 1  $\mu$ M forskolin  
189 (PeproTech), 1  $\mu$ M Wnt-C59 (Bio-Techne Ltd.) for 2 more days and with 10 ng/mL  
190 FGF2, 30 ng/mL BMP4, 1  $\mu$ M forskolin for another day. At day 8 cells were detached  
191 and aggregated in the U bottom microwells in the presence of 20 ng/mL HGF  
192 (PeproTech), 10 ng/mL oncostatin M (OSM, PeproTech), 0.1  $\mu$ M dexamethasone  
193 (Bio-Techne Ltd.), 1  $\mu$ M forskolin, 10  $\mu$ g/mL human recombinant insulin (Sigma  
194 Aldrich), 100  $\mu$ M AAP. After formation of organoids at day 10 they were transferred  
195 into low attachment plates and cultured for another 10 days as free-floating  
196 organoids in William's E media (Thermo Fisher Scientific), supplemented with 10  
197 ng/mL HGF and 10 ng/mL OSM, 10  $\mu$ g/mL insulin, 100  $\mu$ M AAP, 0.1  $\mu$ M  
198 dexamethasone, 1  $\mu$ M forskolin and 10  $\mu$ M DAPT (Bio-Techne Ltd.). The iPSC line  
199 AG27<sup>35-38</sup> was differentiated using a small molecule driven protocol that aims to  
200 sequentially mimic in vivo liver development, resulting in hepatocyte containing liver  
201 organoids as described by Harrison et al.<sup>39</sup>.

202

### 203 **Liver organoid heroin incubation**

204 Prior to heroin incubation with organoids, 1 mM heroin was diluted in the respective  
205 cell medium and sterilized by filtration using a 0.22  $\mu$ m Millex-GV syringe filter (Merck  
206 Millipore). After 20 days differentiation, from 20 to 60 organoids per well were treated  
207 with 10 or 50  $\mu$ M heroin in cell medium for 1, 3, 6, and 24 hours respectively (n=3), in  
208 separate Nunc flat-bottom 96-well microplates (Thermo Fisher Scientific). Metabolism  
209 was stopped by adding FA to a final concentration of 0.11 M, and the plates were  
210 frozen at -80 °C. In parallel, cell medium free from organoids (n=3) were used as  
211 drug degradation control samples.

212

### 213 **Parallel electromembrane extraction setup**

214 Prior to the extraction, 50  $\mu$ L of the heroin-exposed liver organoid samples  
215 (containing 0.11 M FA) was added to 40  $\mu$ L water and 10  $\mu$ L of the 1.5  $\mu$ M or 3  $\mu$ M  
216 internal standard solution. The samples were then loaded into the wells of an in-  
217 house built 96-well stainless-steel plate (**Figure 2A**), previously described by Restan

218 et al.<sup>28</sup>. A volume of 3  $\mu$ L DEHP/NPOE (10/90, w/w) was immobilized into the  
219 membrane pores (0.45  $\mu$ m pore size) of a 96-well MultiScreen-IP polyvinylidene  
220 fluoride (PVDF) filter plate from Merck Millipore (**Figure 2B**). The steel and filter  
221 plates were subsequently clamped together and 100  $\mu$ L of 10 mM ammonium  
222 formate pH 3.1 was loaded into each well of the filter plate, and thus constituting the  
223 acceptor solution. The filter plate was used to house the acceptor solution because  
224 the geometry of the steel plate wells provided better convection of the sample  
225 solution in this configuration, which improved the extraction kinetics. A conductive in-  
226 house built aluminum lid with 96 electrode rods (**Figure 2C**) was placed onto the filter  
227 plate, and the whole construct (**Figure 2D**) was placed on a Vibramax 100 Heidolph  
228 shaking board (Kellheim, Germany). The steel plate holding the organoid solution  
229 was connected to the anode of an external power supply (model ES 0300e0.45,  
230 Delta Elektronika BV, Zierikzee, The Netherlands), while the aluminum electrode lid  
231 was connected to the cathode (**Figure 2E**). Simultaneous extraction of all samples  
232 was performed for 15 min at 900 rpm agitation, with 30 V applied for the first two  
233 minutes and 50 V applied for the remaining extraction duration. The stepped voltage  
234 was used to ensure that the extraction current was kept below 50  $\mu$ A per well, which  
235 was considered a safe limit for robust operation<sup>40</sup>.

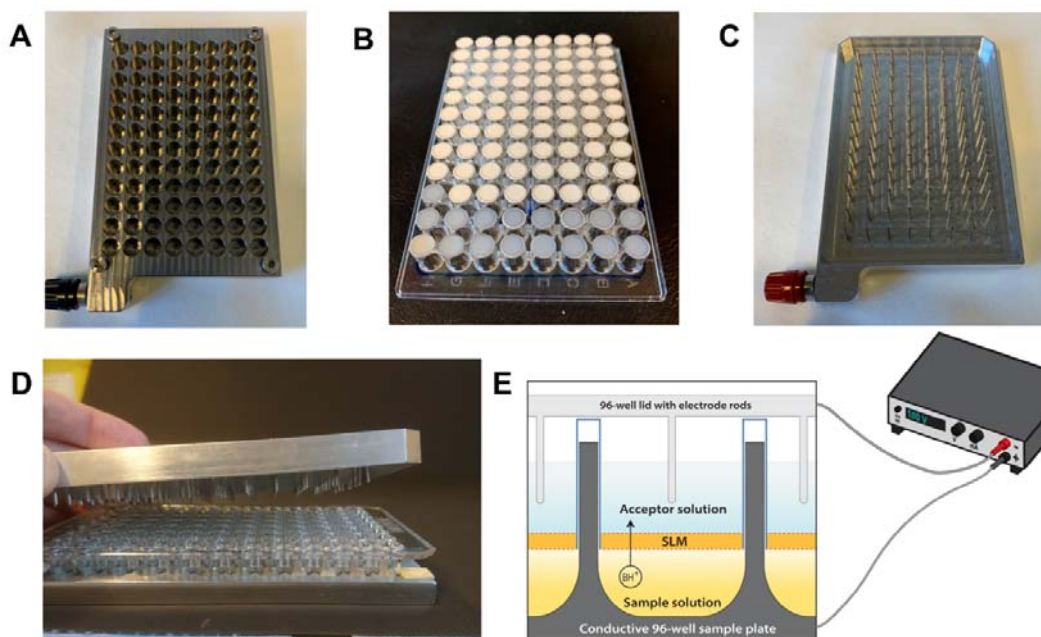

236  
237 **Figure 2.** The experimental setup of 96 well Parallel-EME. (A) The 96 well sample reservoir plate  
238 constituting the donor solution. (B) 96 well filter plate, constituting the acceptor solution. (C) The  
239 aluminum lid with 96 electrode rods. (D) All plates clamped together. (E) Illustration of the extraction  
240 setup of Parallel-EME coupled to the external power supply.



241

242

243 **Ultra high-performance liquid chromatography-mass spectrometry (UHPLC-**  
244 **MS)**

245 Determination of heroin, 6-MAM and morphine was performed using UHPLC-MS  
246 based on a previously described method<sup>41</sup>. The sample extracts were diluted x10  
247 with 5 mM ammonium formate pH 3.1 and analyzed using an Acquity™ UHPLC  
248 pump coupled to a Xevo TQ (triple quadrupole) MS with an electrospray ionization  
249 (ESI) interface, all from Waters (Milford, MA, USA). Separation was achieved using  
250 the Acquity UPLC® HSS T3 C18 column (2.1 x 100 mm, 1.8 µm particles). Solvent A  
251 consisted of 10 mM ammonium formate buffer pH 3.1 and solvent B consisted of  
252 methanol. The sample injection volume was set to 7.5 µL, and the gradient elution  
253 was carried out at a flow rate of 0.5 mL/min at 65 °C using the following gradient  
254 profile: from 0–0.5 min; 100% solvent A, 0.5–2.7 min; 0-10% solvent B, 2.7–3.3 min;  
255 10%–20% solvent B, 3.3–4.6 min; 20%–80% solvent B, 4.6–4.61 min; 80%–100%  
256 solvent B, 4.61-6.60 min; 100% solvent B, 6.60–6.61 min; 100%–0% solvent B, 6.61–  
257 7.50 min; 100% solvent A. The capillary voltage was 3 kV, source temperature 150  
258 °C, desolvation temperature 500 °C and cone gas flow 990 L/h. Detection was  
259 performed in positive mode using multiple reaction monitoring (MRM) with MS/MS  
260 transitions (MS/MS transition 1 being the quantifier and MS/MS transition 2 the  
261 qualifier) and collision energies for heroin ( $m/z$  370> 268 at 30 eV and  $m/z$  370> 211  
262 at 38 eV), 6-MAM ( $m/z$  328> 165 at 42 eV and  $m/z$  328> 211 at 30 eV), morphine  
263 ( $m/z$  286> 201 at 24 eV and  $m/z$  286> 165 at 42 eV), heroin-d9 ( $m/z$  379> 272 at 30  
264 eV), 6-MAM-d6 ( $m/z$  334> 165 at 42 eV) and morphine-d3 (289> 165 at 30 eV). Data  
265 was acquired and processed using MassLynx 4.1 software (Waters).

266

267 **Nano liquid chromatography mass spectrometry (nanoLC-MS)**

268 The nanoLC-MS setup consisted of a TSQ Quantiva, triple quadrupole MS, the  
269 nanoFlex ESI ion source and the EASY-nLC 1000 or 1200 pump equipped with an  
270 autosampler, all from Thermo Fisher. Acclaim PepMap™ 100 C18 (3 µm particle  
271 size) pre- (75 µm inner diameter, ID, and 20 mm length) and analytical (75 µm ID x  
272 50 mm) columns from Thermo Fisher Scientific were used for the chromatographic  
273 separation. In-house made<sup>42</sup> analytical columns were packed with 3 µm Atlantis T3  
274 particles (Waters) or 2.6 µm Accucore particles (Thermo Fisher Scientific) in fused

275 silica capillaries of 75  $\mu\text{m}$  ID from Polymicro Technologies (Phoenix, AZ, USA). The  
276 analytical column was coupled to a 40 mm stainless steel emitter (20  $\mu\text{m}$  ID)  
277 purchased from Thermo Fisher. The extracted organoid samples (AG27 iPSC  
278 derived) were further diluted  $\times 10^3$  in 5 mM of ammonium formate pH 3.1 buffer, and  
279 the injection volume was set to 2  $\mu\text{L}$ . The nanoLC pump was equipped with two  
280 solvent compartments (A and B), where A contained 0.1% FA in LC-MS grade water  
281 (v/v) and B contained 0.1% FA in LC-MS grade water and ACN (10/90, v/v). The  
282 gradient elution was carried out with 3-50% B in 8 min with a constant flow rate of  
283 500 nL/min. The spray voltage was set to 2.2 kV and the ion transfer tube  
284 temperature was set to 310  $^{\circ}\text{C}$ . Detection was performed in positive mode using  
285 MRM with MS/MS transitions and collision energies for heroin ( $m/z$  370> 268 at 38  
286 eV and 370> 211 at 41 eV), 6-MAM ( $m/z$  328> 165 at 48 eV and 328> 211 at 36 eV),  
287 morphine ( $m/z$  286> 181 at 48 eV and 286> 165 at 51 eV), heroin-d9 ( $m/z$  379> 272  
288 at 38 eV and 379> 211 at 41 eV), 6-MAM-d6 ( $m/z$  334> 211 at 35 eV and 334> 165  
289 at 48 eV) and morphine-d3 ( $m/z$  289> 181 at 48 eV and 289> 165 at 51 eV).

290 For a one-column setup, the pump outlet was coupled to an external six-port valve  
291 from Valco Instruments Company Inc (VICI®, Houston, TX, USA) equipped with a 75  
292  $\mu\text{m}$  ID x 11 cm fused silica injection loop (500 nL), a nut with a syringe sleeve and a  
293 75  $\mu\text{m}$  ID x 10 cm fused silica capillary waste outlet. The flow outlet from the 6-port  
294 valve was coupled to a stainless-steel tee-piece (VICI®) through a 20  $\mu\text{m}$  x 40 cm  
295 fused silica capillary from Polymicro Technologies using stainless steel nuts and  
296 vespel/graphite ferrules (VICI®). The analytical column inlet was coupled to the  
297 stainless-steel tee piece, also coupled to a plug through a 550 mm nanoViper (75  $\mu\text{m}$   
298 ID, Thermo Fisher). A 500  $\mu\text{L}$  syringe (51mm) from Hamilton (Reno, Nevada, USA)  
299 was used to load the samples. Xcalibur™ version 2.2 was used to obtain  
300 chromatograms and mass spectra (Thermo Fisher).

### 301 **Protein profiling by nano liquid chromatography mass spectrometry**

302 Acetone precipitated AG27 iPSC derived liver organoid protein samples were  
303 subjected to SDS-PAGE gel electrophoresis, and the gel lanes were sliced into five  
304 sample fractions and digested with trypsin as previously described<sup>43</sup>. The peptide  
305 solutions were desalted using OMIX C18-micro solid phase extraction (SPE) columns  
306 (Agilent, Santa Clara, CA, USA). A Q-Exactive mass spectrometer (Thermo Fisher

307 Scientific) equipped with a nanoFlex nanospray ion source was used for the nanoLC-  
308 MS analyses, coupled to an EASY-nLC 1000 pump (Thermo Fisher). Peptide  
309 separation was achieved using Acclaim PepMap 100 pre- (20 mm) and separation  
310 columns (250 mm) of 75  $\mu\text{m}$  inner diameter and 3  $\mu\text{m}$  particles (Thermo Fisher).  
311 Solvent A was 0.1% FA in LC-MS grade water ( $v/v$ ), and solvent B was 0.1% FA in  
312 LC-MS grade water and ACN (5/95,  $v/v$ ). Peptides were separated using a 180  
313 minutes long gradient ranging from 3-15% solvent B (after optimization with pre-  
314 digested HeLa samples from Thermo Fisher). The mass spectrometer was run in  
315 positive mode with full MS ( $m/z = 400\text{-}2000$ ) and data dependent tandem mass  
316 spectrometry (ddMS2) with top N set to be 10 ions. Raw files were processed and  
317 database searches performed with Proteome Discoverer 2.3 (Thermo Fisher  
318 Scientific), using MASCOT version 2.4 to search the SwissProt database (human, 20  
319 431 entries). Proteins were identified with the following settings; peptide identification  
320 with a false discovery rate (FDR) threshold of  $\leq 0.01$ , protein identification with a FDR  
321 threshold of  $\leq 0.01$  (strict) and  $\leq 0.05$  (relaxed) and digestion by trypsin with at most  
322 one missed cleavage. Dynamic modification was set to be oxidation and acetyl (N-  
323 term), static modification was set to be carbamidomethyl. Information on the elution  
324 profile and fragment match spectrum of each of the identified peptides for hCES1  
325 (accession number P23141), hCES2 (also called cocaine esterase, accession  
326 number O00748) and UDP-glucuronosyltransferase 2B7 (accession number P16662)  
327 were obtained and verified by comparison with the raw file.

328

### 329 **Calculation of Recovery**

330 Recovery measurements were performed using capillary electrophoresis with  
331 ultraviolet spectroscopy detection (CE-UV) (See supplementary for experimental  
332 description) with an initial analyte concentration of 5  $\mu\text{M}$ . The recovery (%) was  
333 calculated using the following formula:

334

$$335 \quad R (\%) = \frac{A_{\text{final}}}{A_{\text{initial}}} \times 100\%$$

336

337 Where  $A_{\text{final}}$  and  $A_{\text{initial}}$  are the area of analyte collected in the acceptor solution and  
338 the area of the analyte originally present in the sample.

339

340

341

342

## 343 **Results and Discussion**

344 In this study, several analytical approaches were evaluated for liver organoid drug  
345 measurements. With the future objective of advancing to online analyses, EME was  
346 assessed in 96-well format (Parallel-EME) for the high-throughput clean-up of  
347 analytes from the organoid cell medium, a method previously shown to enable  
348 selective and fast extraction from complex matrices (and also on-chip)<sup>44</sup>. A  
349 conventional UHPLC-MS method used for clinical routine analyses was applied to  
350 explore heroin metabolizing properties of the Parallel-EME extracted liver organoids.  
351 To get an understanding of the heroin metabolizing liver enzymes present in the  
352 organoids, an untargeted proteomic case study using nanoLC-MS was undertaken.  
353 Lastly, two analytical approaches more suitable for online action, limited samples,  
354 and increased sensitivity were evaluated: CE which is widely established for rapid  
355 on-chip separations<sup>45-47</sup>, and nanoLC-MS allowing for high sensitivity  
356 measurements<sup>48</sup>.

357

### 358 **Parallel electromembrane extraction optimization for heroin and metabolites**

359 To evaluate the potential of MS for analysis of liver organoids, heroin was chosen as  
360 a model substance, due to its familiar phase I metabolism to 6-MAM and morphine in  
361 the liver. Although morphine extraction with EME has previously been performed<sup>49-51</sup>,  
362 the extraction of heroin and 6-MAM with EME has to our knowledge not previously  
363 been performed. Therefore, Parallel-EME conditions focusing on these three  
364 compounds were initially assessed. The experimental conditions (**Figure 3**) were  
365 selected based on previous experience and literature reports<sup>49,52,53</sup>. Due to the  
366 difference in polarity of the analytes, > 30% recovery and < 15% RSD were set as  
367 the acceptance criteria of extraction performance. Best recovery and repeatability for  
368 analytes in both standard solutions and spiked cell medium samples were obtained  
369 using an Parallel-EME system comprising 10% (w/w) DEHP/NPOE as SLM, an  
370 extraction time of 15 min, and an extraction voltage of 50 V. From cell medium, these  
371 conditions gave recoveries of 76% (heroin), 82% (6-MAM), and 36% (morphine) and  
372 RSD < 10%, which was considered acceptable for the current application. The

373 extraction method was therefore not optimized any further. With these parameters,  
374 the average extraction current was  $< 50 \mu\text{A}$  per well throughout the extraction. For  
375 increasing accuracy, correction for non-exhaustive extractions was done by spiking  
376 samples with isotopically labelled internal standards prior to extraction.

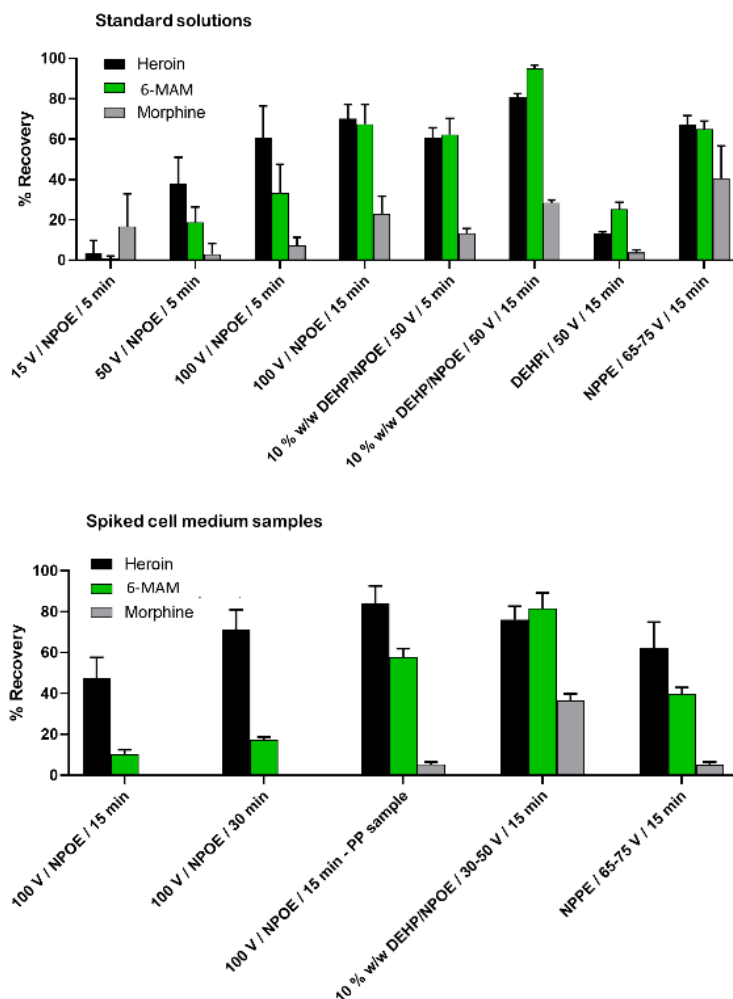

377

378 **Figure 3.** Analyte recovery (%) of Parallel-EME under varying conditions (SLM composition, extraction  
379 voltage and extraction time), with  $5 \mu\text{M}$  standard solutions and spiked cell medium samples using CE-  
380 UV for quantitation.

381

### 382 **Parallel electromembrane extraction of liver organoid heroin metabolites**

383 Samples containing 20 and 60 liver organoids per well were exposed to  $10 \mu\text{M}$  heroin  
384 for 1, 3, 6 and 24 hours. With the exception of 6-MAM and heroin at time point 24  
385 hours, the sample to sample repeatability was 0.4%-25% with the two organoid iPSC  
386 sources (**Figure 4A-B**). Heroin levels decreased with time to 6-MAM (both enzymatic  
387 and non-enzymatic), and with subsequent enzymatic metabolism to morphine,  
388 adding to the confirmation that the liver organoids had traits related to human livers.

389 Similar heroin metabolism kinetics was also observed for liver organoids derived from  
390 hepatocytes from one patient case (see **Figure S-2**). However, the kinetics were  
391 (expectedly) substantially slower than that observed with e.g. high enzyme-  
392 availability microsomes and S9-fraction<sup>17,54</sup>, see **Figure S-3**; Although Parallel-EME  
393 and MS are compatible with phase I metabolism monitoring, we were not able to  
394 observe phase II metabolites morphine-3-glucuronide (M3G) and morphine-6-  
395 glucuronide (M6G). Traces of these metabolites could however be observed when  
396 employing more manual, centrifugation-based sample preparation (**Figure S-4**). A  
397 key reason is a weakness of EME, that highly polar compounds have low recovery;  
398 this can in many cases be fine-tuned<sup>53,55</sup>.  
399

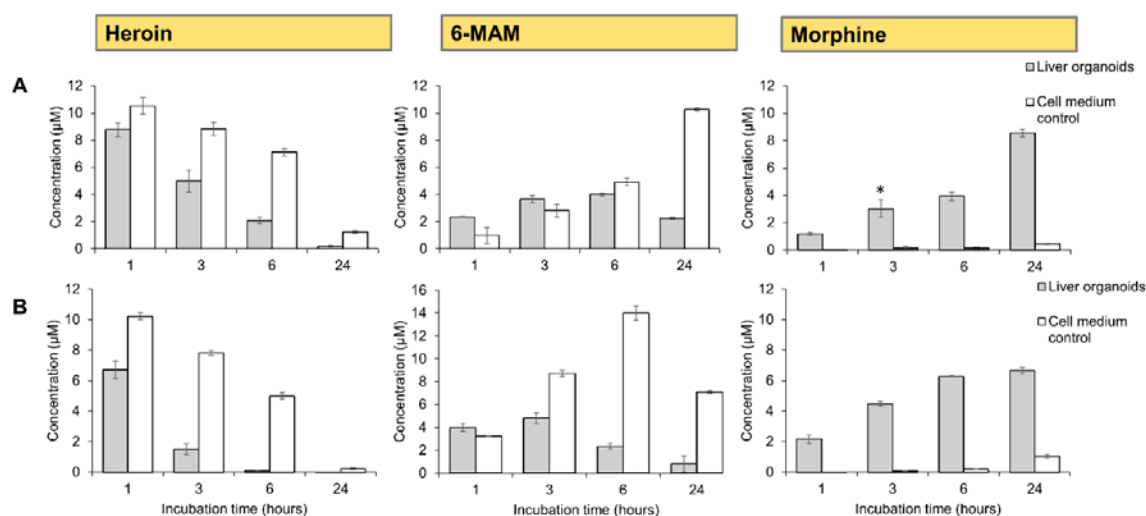

400

401 **Figure 4.** Concentration of heroin and metabolites in a study of liver organoid drug metabolism using  
402 Parallel-EME and UHPLC-MS, after incubation of liver organoids differentiated from the iPSC cell lines  
403 **(A)** AG27 (60 organoids) and **(B)** HPSI0114i-vabj\_3 (20 organoids) in 10 µM heroin for 1, 3, 6- and 24  
404 hours. In parallel, cell medium free from organoids were used as drug degradation control samples.  
405 Each bar represents the mean ( $\pm$  SD) of triplicate samples. One of the three replicates of time point 6  
406 hours liver organoids (HPSI0114i-vabj\_3) was discarded. The asterisk indicates the removal of one  
407 data point due to poor internal standard signal.  
408

409 To complement the observations of the liver organoids enzymatic heroin  
410 metabolizing properties, a case study using MS-based untargeted proteomics was  
411 undertaken. We could identify the presence of proteotypic peptides (FDR  $\leq$  1%)  
412 related to the key liver enzymes<sup>56-60</sup> hCES1 (9 peptides identified) and hCES2 (4  
413 peptides identified) in the organoids differentiated from the iPSC cell line AG27  
414 (**Figure 5A-C**, see also **Table S-1** for peptide overview). Also, one peptide was

415 identified related to one of the heroin phase II metabolism enzymes<sup>33,57</sup>, UDP-  
416 glucuronosyltransferase 2B7 (**Table S-1**).

417

418

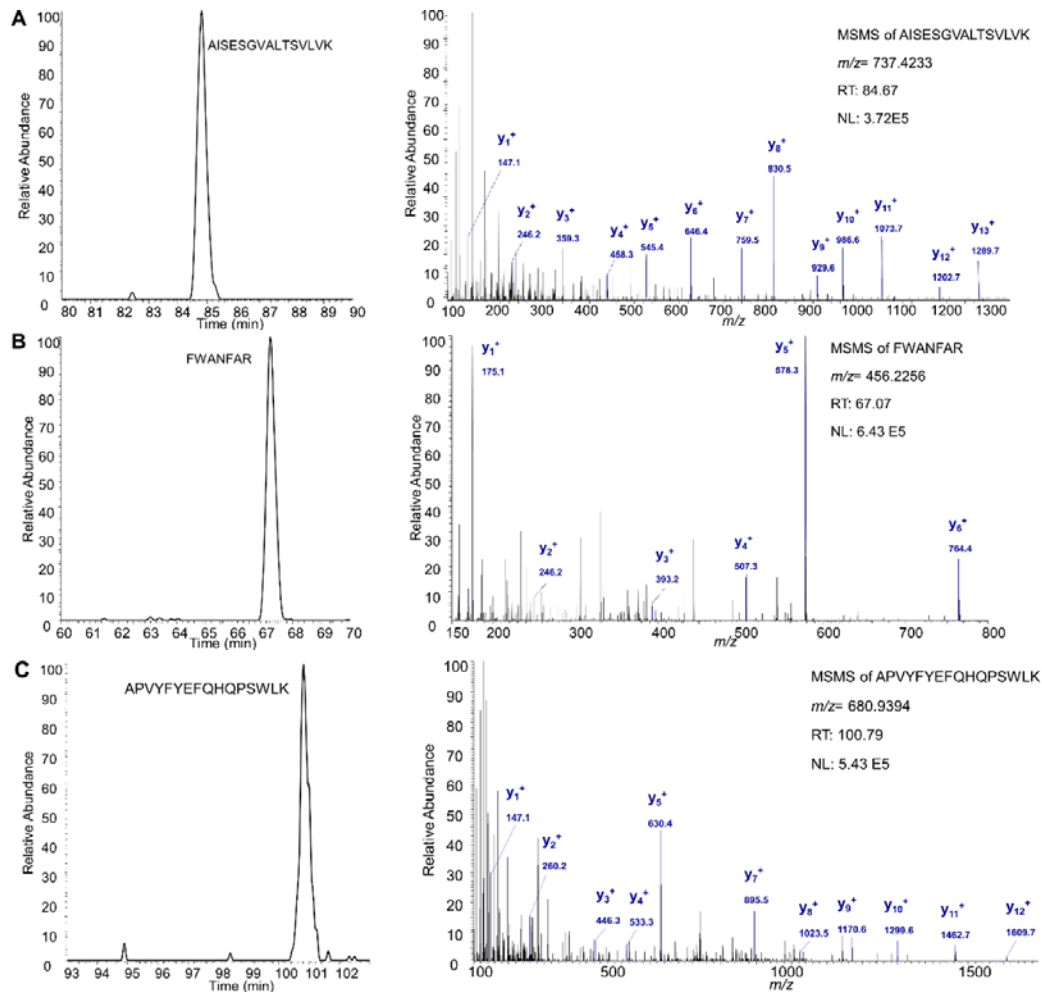

419

420

421

422 **Figure 5.** Total ion chromatogram of identified peptides (left) and the respective peptide fragmentation  
423 spectrum (right) of enzymes related to heroin liver phase I metabolism. **(A)** The peptide  
424 AISESGVALTSVLVK ( $m/z$  737.42) from hCES1, identified at charge +2. **(B)** The peptide FWANFAR  
425 ( $m/z$  456.23) from hCES1, identified at charge +2. **(C)** The peptide APVYFYEFQHQPSWLK ( $m/z$   
680.94) from hCES2, identified at charge +3.

426

### 427 **Organoid EME extracts compatibility with various separation techniques**

428 The organoid EME extracts were analyzed using UHPLC-MS instrumentation, which  
429 provided high resolution separations within 5 min (**Figure S-5**). We have also  
430 investigated other separation approaches that can be compatible with small samples  
431 and online action. Capillary electrophoresis, perhaps the most “chip-ready” of the  
432 techniques investigated, was capable of fast separations of organoid extracts

433 (separation within 2.5 min) and low sample consumption (injection volume equivalent  
434 to 107 nL), with these initial experiments demonstrated with simple UV detection  
435 (**Figure S-6**). However, organoid incubation in 50  $\mu$ M heroin was needed to achieve  
436 detection with CE-UV, and thus no further quantification of the analytes could be  
437 performed.

438

439 The limit of quantification (LOQ) for UHPLC-MS measurements in this study was 1  
440 nM (7  $\mu$ L injection volume). NanoLC, a sensitive approach that has been mostly  
441 associated with proteomics in recent years, was seen to provide 0.95 pM detection (1  
442  $\mu$ L injection volume) for some small molecule analytes such as heroin (results not  
443 shown). The organoid extracts analyzed with nanoLC-MS could thus be 1 000 times  
444 more diluted compared to that of UHPLC-MS analysis, without compromising on  
445 chromatographic performance or sensitivity for the more hydrophobic analytes heroin  
446 and 6-MAM (**Figure 6A**). However, poor performance was associated with nanoLC-  
447 MS analysis of morphine, the most polar of the metabolites observed; the  
448 chromatographic peak was completely absent in the chromatograms of the organoid  
449 extracts (**Figure 6A**), and was sporadically very deformed or absent in that of  
450 standard solutions. This was the case for large volume injection, both using on-  
451 column injection and using an SPE column. We also examined in-house packed  
452 nano reversed phase (RP) LC columns which were more compatible with highly  
453 aqueous mobile phases (Accucore and Atlantis T3), but poor peak shape and  
454 breakthrough/poor retention time repeatability were still issues. Various parameters  
455 were tested, e.g. sample loading time and maximum sample loading pressure (of the  
456 Thermo nano pumps). To illustrate these effects, see **Figure 6B**, which shows that  
457 several loading times were suited for 6-MAM and heroin using on-column injection,  
458 but none were suited for morphine.

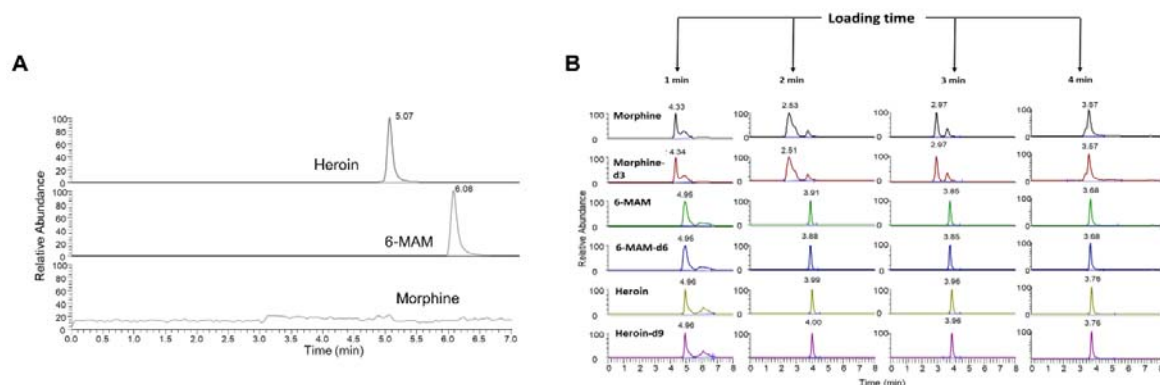

459



460 **Figure 6. (A)** MRM chromatograms of heroin, 6-MAM, and morphine in the extracted liver organoid  
461 sample treated with 10  $\mu$ M heroin for 1 hours (AG27). The sample was analyzed using a two-column  
462 setup with Acclaim PepMap columns, and injection volume of 2  $\mu$ L. **(B)** MRM-chromatograms of a 375  
463 nM standard solution containing heroin, morphine, 6-MAM, and their corresponding internal standards,  
464 analyzed using the one-column setup equipped with an Acclaim PepMap commercially packed  
465 analytical column with different on-column loading times (1, 2, 3 and 4 min), and injection volume of  
466 500 nL.  
467

## 468 **Conclusions**

469 Liver organoids and LC-MS measurements is a promising concept for drug  
470 metabolism studies, here demonstrated for heroin phase I metabolism. This concept  
471 can be well suited for drug metabolism studies of other drugs, and direct  
472 measurements of drug metabolism could also provide valuable insight when  
473 optimizing organoid development protocols. A proteomic case study using nanoLC-  
474 MS identified proteotypic peptides from heroin metabolizing enzymes,  
475 complementing the observations of the liver organoids enzymatic heroin metabolizing  
476 properties. EME-MS showed to be a promising combination for liver organoid based  
477 analysis of drug metabolism. EME in 96-well format (Parallel-EME) was used to  
478 extract heroin and metabolites from various organoids in a complex medium,  
479 followed by UHPLC-MS measurements. In addition, the chromatographic  
480 performance was not perturbed by the initial complex matrix (analyte retention time  
481 repeatability with a maximum RSD of 0.07%), suggesting that Parallel-EME was a  
482 suited basis for organoid derived sample preparation. It is reasonable to assume that  
483 the approach can also be applicable to other organoid variants, e.g. kidney and  
484 heart. Parallel-EME was indeed an approach that allowed multiple samples to be  
485 simply handled, more so than standard approaches to related tissues  
486 (centrifugations, several sample pipetting steps), which can allow higher throughput  
487 in larger-scale studies. We are currently developing 96-well plates made of  
488 conductive polymers, which we believe will be suited for both cell studies and EME;  
489 this will reduce yet another step of sample handling. One disadvantage that needs to  
490 be addressed is the difficulty in extracting very polar metabolites with EME, and  
491 further optimizations will therefore continue.

492

493 Following this proof-of-concept study, we will continue to explore iterations of the  
494 here presented EME-configuration with the aim of further increasing sensitivity while  
495 retaining robustness and scalability; a natural next step will be nanoliter-scale online

496 EME-LC-MS of organoid derived samples. Related systems have been demonstrated  
497 with microsomes<sup>30</sup>, but those systems require larger separation columns, and are  
498 arguably not suited for trace samples. Due to challenges with nanoLC, we will  
499 instead likely investigate the use of capillary LC or microbore LC, as a compromise  
500 between sensitivity and robustness.

501

## 502 Acknowledgements

503 This work was supported by the Research Council of Norway through its Centre of  
504 Excellence scheme, project number 262613. The work was also supported by the  
505 Olav Thon Foundation. Financial support from UiO:Life Science is also gratefully  
506 acknowledged. Technical assistance by Elisabeth Nerem (Department of Forensic  
507 Sciences, Oslo University Hospital, Oslo, Norway) was greatly appreciated.

508

## 509 References

- 510 (1) Prakash, C.; Shaffer, C. L.; Nedderman, A. *Mass Spectrom. Rev.* **2007**, *26* (3), 340-369.  
511 (2) Au, S. H.; Chamberlain, M. D.; Mahesh, S.; Sefton, M. V.; Wheeler, A. R. *Lab Chip* **2014**,  
512 *14* (17), 3290-3299.  
513 (3) Matthews, H.; Hanison, J.; Nirmalan, N. *Proteomes* **2016**, *4* (3), 28.  
514 (4) Lancaster, M. A.; Knoblich, J. A. *Science* **2014**, *345* (6194), 1247125.  
515 (5) Clevers, H. *Cell* **2016**, *165* (7), 1586-1597.  
516 (6) Rossi, G.; Manfrin, A.; Lutolf, M. P. *Nat. Rev. Genet.* **2018**, *19* (11), 671-687.  
517 (7) Pampaloni, F.; Reynaud, E. G.; Stelzer, E. H. K. *Nat. Rev. Mol. Cell Biol.* **2007**, *8* (10),  
518 839-845.  
519 (8) Westmoreland, C.; Holmes, A. M. *Organogenesis* **2009**, *5* (2), 67-72.  
520 (9) Lancaster, M. A.; Renner, M.; Martin, C.-A.; Wenzel, D.; Bicknell, L. S.; Hurles, M. E.;  
521 Homfray, T.; Penninger, J. M.; Jackson, A. P.; Knoblich, J. A. *Nature* **2013**, *501* (7467), 373-  
522 379.  
523 (10) Stevens, K. R.; Kreutziger, K. L.; Dupras, S. K.; Korte, F. S.; Regnier, M.; Muskheli, V.;  
524 Nourse, M. B.; Bendixen, K.; Reinecke, H.; Murry, C. E. *Proc. Natl. Acad. Sci. U. S. A.* **2009**,  
525 *106* (39), 16568-16573.  
526 (11) van de Wetering, M.; Francies, Hayley E.; Francis, Joshua M.; Bounova, G.; Iorio, F.;  
527 Pronk, A.; van Houdt, W.; van Gorp, J.; Taylor-Weiner, A.; Kester, L.; McLaren-Douglas, A.;  
528 Blokker, J.; Jaksani, S.; Bartfeld, S.; Volckman, R.; van Sluis, P.; Li, Vivian S. W.; Seepo, S.;  
529 Sekhar Pedamallu, C.; Cibulskis, K., et al. *Cell* **2015**, *161* (4), 933-945.  
530 (12) Huch, M.; Dorrell, C.; Boj, S. F.; van Es, J. H.; Li, V. S. W.; van de Wetering, M.; Sato,  
531 T.; Hamer, K.; Sasaki, N.; Finegold, M. J.; Haft, A.; Vries, R. G.; Grompe, M.; Clevers, H.  
532 *Nature* **2013**, *494* (7436), 247-250.  
533 (13) Park, E.; Kim, H. K.; Jee, J.; Hahn, S.; Jeong, S.; Yoo, J. *Toxicol. Appl. Pharmacol.*  
534 **2019**, *385*, 114790.  
535 (14) Huch, M.; Gehart, H.; van Boxtel, R.; Hamer, K.; Blokzijl, F.; Verstegen, Monique M.  
536 A.; Ellis, E.; van Wenum, M.; Fuchs, Sabine A.; de Ligt, J.; van de Wetering, M.; Sasaki, N.;

- 537 Boers, Susanne J.; Kemperman, H.; de Jonge, J.; Ijzermans, Jan N. M.; Nieuwenhuis,  
538 Edward E. S.; Hoekstra, R.; Strom, S.; Vries, Robert R. G., et al. *Cell* **2015**, *160* (1), 299-312.  
539 (15) Driehuis, E.; Kretzschmar, K.; Clevers, H. *Nature Protocols* **2020**, *15* (10), 3380-3409.  
540 (16) Jia, L.; Liu, X. *Curr. Drug Metab.* **2007**, *8* (8), 822-829.  
541 (17) Brandon, E. F. A.; Raap, C. D.; Meijerman, I.; Beijnen, J. H.; Schellens, J. H. M.  
542 *Toxicol. Appl. Pharmacol.* **2003**, *189* (3), 233-246.  
543 (18) Greek, R.; Menache, A. *Int. J. Med. Sci.* **2013**, *10* (3), 206-221.  
544 (19) Yoshida, S.; Miwa, H.; Kawachi, T.; Kume, S.; Takahashi, K. *Sci. Rep.* **2020**, *10* (1),  
545 5989.  
546 (20) Mills, R. J.; Parker, B. L.; Quaife-Ryan, G. A.; Voges, H. K.; Needham, E. J.; Bornot,  
547 A.; Ding, M.; Andersson, H.; Polla, M.; Elliott, D. A.; Drowley, L.; Clausen, M.; Plowright,  
548 A. T.; Barrett, I. P.; Wang, Q.-D.; James, D. E.; Porrello, E. R.; Hudson, J. E. *Cell Stem Cell*  
549 **2019**, *24* (6), 895-907.  
550 (21) Lu, W.; Rettenmeier, E.; Paszek, M.; Yueh, M.-F.; Tukey, R. H.; Trotter, J.; Barbier, O.;  
551 Chen, S. *Drug Metab. Dispos.* **2017**, *45* (7), 748-754.  
552 (22) Lin, A.; Sved Skottvoll, F.; Rayner, S.; Pedersen-Bjergaard, S.; Sullivan, G.; Krauss, S.;  
553 Ray Wilson, S.; Harrison, S. *Electrophoresis* **2020**, *41* (1-2), 56-64.  
554 (23) Pedersen-Bjergaard, S.; Rasmussen, K. E. *J. Chromatogr. A* **2006**, *1109* (2), 183-190.  
555 (24) Drouin, N.; Kubáň, P.; Rudaz, S.; Pedersen-Bjergaard, S.; Schappler, J. *TrAC, Trends*  
556 *Anal. Chem.* **2019**, *113*, 357-363.  
557 (25) Gjelstad, A.; Rasmussen, K. E.; Pedersen-Bjergaard, S. *Anal. Bioanal. Chem.* **2009**, *393*  
558 (3), 921-928.  
559 (26) Eibak, L. E. E.; Rasmussen, K. E.; Øiestad, E. L.; Pedersen-Bjergaard, S.; Gjelstad, A.  
560 *Anal. Chim. Acta* **2014**, *828*, 46-52.  
561 (27) Drouin, N.; Mandscheff, J.-F.; Rudaz, S.; Schappler, J. *Anal. Chem.* **2017**, *89* (12), 6346-  
562 6350.  
563 (28) Restan, M. S.; Pedersen, M. E.; Jensen, H.; Pedersen-Bjergaard, S. *Anal. Chem.* **2019**, *91*  
564 (10), 6702-6708.  
565 (29) Petersen, N. J.; Jensen, H.; Hansen, S. H.; Foss, S. T.; Snakenborg, D.; Pedersen-  
566 Bjergaard, S. *Microfluid. Nanofluid.* **2010**, *9* (4), 881-888.  
567 (30) Hansen, F. A.; Sticker, D.; Kutter, J. P.; Petersen, N. J.; Pedersen-Bjergaard, S. *Anal.*  
568 *Chem.* **2018**, *90* (15), 9322-9329.  
569 (31) Kamendulis, L. M.; Brzezinski, M. R.; Pindel, E. V.; Bosron, W. F.; Dean, R. A. *J.*  
570 *Pharmacol. Exp. Ther.* **1996**, *279* (2), 713.  
571 (32) Elisabeth, J. R.; Alwin, D. R. H.; Wim v. d, B.; Jan, M. v. R.; Jos, H. B. *Curr. Clin.*  
572 *Pharmacol.* **2006**, *1* (1), 109-118.  
573 (33) Maurer, H. H.; Sauer, C.; Theobald, D. S. *Ther. Drug Monit.* **2006**, *28* (3), 447-453.  
574 (34) Ang, L. T.; Tan, A. K. Y.; Autio, M. I.; Goh, S. H.; Choo, S. H.; Lee, K. L.; Tan, J.; Pan,  
575 B.; Lee, J. J. H.; Lum, J. J.; Lim, C. Y. Y.; Yeo, I. K. X.; Wong, C. J. Y.; Liu, M.; Oh, J. L.  
576 L.; Chia, C. P. L.; Loh, C. H.; Chen, A.; Chen, Q.; Weissman, I. L., et al. *Cell Rep.* **2018**, *22*  
577 (8), 2190-2205.  
578 (35) Mathapati, S.; Siller, R.; Impellizzeri, A. A. R.; Lycke, M.; Vegheim, K.; Almaas, R.;  
579 Sullivan, G. J. *Curr. Protoc. Stem Cell Biol.* **2016**, *38* (1), 1G.6.1-1G.6.18.  
580 (36) Siller, R.; Greenhough, S.; Naumovska, E.; Sullivan, Gareth J. *Stem Cell Rep.* **2015**, *4*  
581 (5), 939-952.  
582 (37) Siller, R.; Naumovska, E.; Mathapati, S.; Lycke, M.; Greenhough, S.; Sullivan, G. J. *Sci.*  
583 *Rep.* **2016**, *6* (1), 37178.  
584 (38) Siller, R.; Sullivan, G. J. *Curr. Protoc. Stem Cell Biol.* **2017**, *43* (1), 1G.7.1-1G.7.23.  
585 (39) Harrison, S. P.; Sillar, R.; Tanaka, Y.; Xiang, Y.; Patterson, B.; Kempf, H.; Melum, E.;  
586 Åsrud, K.; Chollet, M. E.; Andersen, E.; Sandset, P. M.; Baumgarten, S.; Bonanini, F.; Kurek,

- 587 D.; Mathapati, S.; Almaas, R.; Sharma, K.; Wilson, S. R.; Skottvoll, F. S.; Boger, I. C., et al.  
588 *bioRxiv* **2020**, 2020.2012.2002.406835.
- 589 (40) Hansen, F. A.; Jensen, H.; Pedersen-Bjergaard, S. *Anal. Chem.* **2020**, *92* (7), 5595-5603.
- 590 (41) Karinen, R.; Andersen, J. M.; Ripel, Å.; Hasvold, I.; Hopen, A. B.; Mørland, J.;  
591 Christophersen, A. S. *J. Anal. Toxicol.* **2009**, *33* (7), 345-350.
- 592 (42) Berg, H. S.; Seterdal, K. E.; Smetop, T.; Rozenvalds, R.; Brandtzaeg, O. K.; Vehus, T.;  
593 Lundanes, E.; Wilson, S. R. *J. Chromatogr. A* **2017**, *1498*, 111-119.
- 594 (43) Skottvoll, F. S.; Berg, H. E.; Bjørseth, K.; Lund, K.; Roos, N.; Bekhradnia, S.; Thiede,  
595 B.; Sandberg, C.; Vik-Mo, E. O.; Roberg-Larsen, H.; Nyström, B.; Lundanes, E.; Wilson, S.  
596 R. *Future Sci. OA* **2018**, *5* (1), FSO359.
- 597 (44) Pedersen-Bjergaard, S. *Anal. Bioanal. Chem.* **2019**, *411* (9), 1687-1693.
- 598 (45) Chan, S. D. H.; Toyoda, H.; Sanjeeviraman, J.; Souppé, A.; Iwamoto, M.; Wu, W.; Eto,  
599 D.; Tada, T.; Kumada, T.; Zhang, J.-P. *Sci. Rep.* **2020**, *10* (1), 7379.
- 600 (46) Ou, X.; Chen, P.; Huang, X.; Li, S.; Liu, B.-F. *J. Sep. Sci.* **2020**, *43* (1), 258-270.
- 601 (47) Cong, H.; Xu, X.; Yu, B.; Yuan, H.; Peng, Q.; Tian, C. *J. Micromech. Microeng* **2015**, *25*  
602 (5), 053001.
- 603 (48) Fanali, S. *ELECTROPHORESIS* **2017**, *38* (15), 1822-1829.
- 604 (49) Yamini, Y.; Pourali, A.; Seidi, S.; Rezazadeh, M. *Anal. Methods* **2014**, *6* (15), 5554-  
605 5565.
- 606 (50) Rahimi, A.; Nojavan, S.; Tabani, H. *J. Pharm. Biomed. Anal.* **2020**, *184*, 113175.
- 607 (51) Ahmar, H.; Tabani, H.; Hossein Koruni, M.; Davarani, S. S. H.; Fakhari, A. R. *Biosens.*  
608 *Bioelectron* **2014**, *54*, 189-194.
- 609 (52) Huang, C.; Seip, K. F.; Gjølstad, A.; Pedersen-Bjergaard, S. *Anal. Chim. Acta* **2016**, *934*,  
610 80-87.
- 611 (53) Drouin, N.; Rudaz, S.; Schappler, J. *J. Pharm. Biomed. Anal.* **2018**, *159*, 53-59.
- 612 (54) Qian, Y.; Gilliland, T. K.; Markowitz, J. S. *Chem. Biol. Interact.* **2020**, *316*, 108914.
- 613 (55) Román-Hidalgo, C.; Martín-Valero, M. J.; Fernández-Torres, R.; Callejón-Mochón, M.;  
614 Bello-López, M. Á. *Talanta* **2017**, *162*, 32-37.
- 615 (56) Wang, X.; Liang, Y.; Liu, L.; Shi, J.; Zhu, H.-J. *Rapid Commun. Mass Spectrom.* **2016**,  
616 *30* (5), 553-561.
- 617 (57) Prasad, B.; Bhatt, D. K.; Johnson, K.; Chapa, R.; Chu, X.; Salphati, L.; Xiao, G.; Lee, C.;  
618 Hop, C. E. C. A.; Mathias, A.; Lai, Y.; Liao, M.; Humphreys, W. G.; Kumer, S. C.; Unadkat,  
619 J. D. *Drug Metab. Dispos.* **2018**, *46* (7), 943.
- 620 (58) Wang, X.; Shi, J.; Zhu, H.-J. *Proteomics* **2019**, *19* (4), 1800288.
- 621 (59) Boberg, M.; Vrana, M.; Mehrotra, A.; Pearce, R. E.; Gaedigk, A.; Bhatt, D. K.; Leeder, J.  
622 S.; Prasad, B. *Drug Metab. Dispos.* **2017**, *45* (2), 216-223.
- 623 (60) Sato, Y.; Miyashita, A.; Iwatsubo, T.; Usui, T. *Drug Metab. Dispos.* **2012**, *40* (7), 1389-  
624 1396.
- 625
