# 1 Electromembrane extraction and mass spectrometry for 2 liver organoid drug metabolism studies

3  
4 Frøydis Sved Skottvoll<sup>a,b</sup>, Frederik Hansen<sup>c</sup>, Sean Harrison<sup>b</sup>, Ida Sneis Boger<sup>a,b</sup>, Ago  
5 Mrsa<sup>a,b</sup>, Magnus Saed Restan<sup>c</sup>, Matthias Stein<sup>d</sup>, Elsa Lundanes<sup>a</sup>, Stig Pedersen-  
6 Bjergaard<sup>c,e</sup>, Aleksandra Aizenshtadt<sup>b</sup>, Stefan Krauss<sup>b</sup>, Gareth Sullivan<sup>b,f</sup>, Inger Lise  
7 Bogen<sup>g,h</sup>, Steven Ray Wilson<sup>a,b\*</sup>

8  
9 <sup>a</sup> Department of Chemistry, University of Oslo, P.O. Box 1033, Blindern, NO-0315  
10 Oslo, Norway

11 <sup>b</sup> Hybrid Technology Hub-Centre of Excellence, Institute of Basic Medical Sciences,  
12 Faculty of Medicine, University of Oslo, P.O. Box 1112 Blindern, NO-0317 Oslo,  
13 Norway

14 <sup>c</sup> Department of Pharmacy, University of Oslo, P.O. Box 1068 Blindern, NO-0316  
15 Oslo, Norway

16 <sup>d</sup> Institute of Medicinal and Pharmaceutical Chemistry, TU Braunschweig,  
17 Beethovenstr. 55, DE-38106 Braunschweig, Germany

18 <sup>e</sup> Department of Pharmacy, Faculty of Health and Medical Sciences, University of  
19 Copenhagen, Universitetsparken 2, 2100 Copenhagen, Denmark

20 <sup>f</sup> Department of Pediatric Research, Oslo University Hospital and University of Oslo,  
21 PO Box 1112 Blindern, 0317 Oslo, Norway

22 <sup>g</sup> Section for Drug Abuse Research, Department of Forensic Sciences, Oslo  
23 University Hospital, P.O. Box 4950 Nydalen, NO-0424 Oslo, Norway

24 <sup>h</sup> Institute of Basic Medical Sciences, Faculty of Medicine, University of Oslo, P.O.  
25 Box 1103 Blindern, NO-0317 Oslo, Norway

26  
27 \*Corresponding author: [stevenw@kjemi.uio.no](mailto:stevenw@kjemi.uio.no), +47 97010953.  
28 <https://orcid.org/0000-0002-9755-1188>

29

30

31

32

## 33 **Abstract**

34 Liver organoids (miniature, organ-like biomaterials derived from e.g. a patient's stem  
35 cells) are emerging tools for precision drug development and toxicity screening. We  
36 demonstrate that electromembrane extraction (EME) is suited for collecting organoid-  
37 derived drug metabolites prior to mass spectrometry (MS)-based measurements.  
38 EME, which is essentially electrophoresis across an oil membrane, allowed drugs  
39 and drug metabolites to be separated from medium components (albumin, etc.) that  
40 could interfere with subsequent measurements. Multi-well EME (100  $\mu$ L solutions)  
41 allowed for simple and repeatable monitoring of heroin metabolism kinetics. Organoid  
42 EME extracts were compatible with ultrahigh-pressure liquid chromatography  
43 (UHPLC) and capillary electrophoresis (CE), used to separate the analytes prior to  
44 detection. These initial efforts show that organoids are well-matched with various  
45 electrophoresis/chromatography techniques and MS measurements.

46

47

48 **Keywords:** Organoids; Drug metabolism; Electromembrane extraction; Liquid  
49 chromatography; Mass spectrometry

50

51

52

53

54

55

56

57

58

59

60

## 61 **Introduction**

62 Organoids are three-dimensional tissue models derived from e.g. primary tissues,  
63 embryonic stem cells or induced pluripotent stem cells (iPSC) <sup>1-3</sup>. These “mini”  
64 organs are emerging tools for studying human development and disease, serving as  
65 alternatives to e.g. animal models <sup>4,5</sup>. A wide variety of organoids are being  
66 developed and studied, e.g. brain, heart, tumor tissue and liver <sup>6-9</sup>. Liver organoids  
67 can be valuable models for studying drug metabolism and toxicity, perhaps even in a  
68 personalized fashion, as organoids can be derived from the cells of a patient.  
69 However, there are few studies dedicated to organoid drug metabolism using mass  
70 spectrometry <sup>10</sup> which is a central tool in small drug determination (in  
71 pharmacokinetics, forensics, etc.). Our goals have been to: develop and apply  
72 analytical approaches that are suited for liver organoids (**Figure 1, upper right**),  
73 minimize contaminations from e.g. medium (can contain 10 % fetal bovine serum),  
74 and assess the potential for advancement to online systems. For extracting drugs,  
75 and the metabolites produced by organoids, we have applied electromembrane  
76 extraction (EME, **Figure 1, left**). EME is essentially an electrophoretic separation  
77 across an oil membrane <sup>11,12</sup>. EME is highly successful separating small drugs from  
78 e.g. macromolecules, even in whole blood <sup>13</sup>. EME has recently advanced to the 96-  
79 well plate format <sup>14-16</sup> (**Figure 1, lower right**) and chip systems <sup>17,18</sup>. We demonstrate  
80 that EME is suited for studying drug metabolism in small organoid samples. We also  
81 show that EME organoid extracts are compatible with several variants of separation  
82 techniques and mass spectrometric measurements.  
83

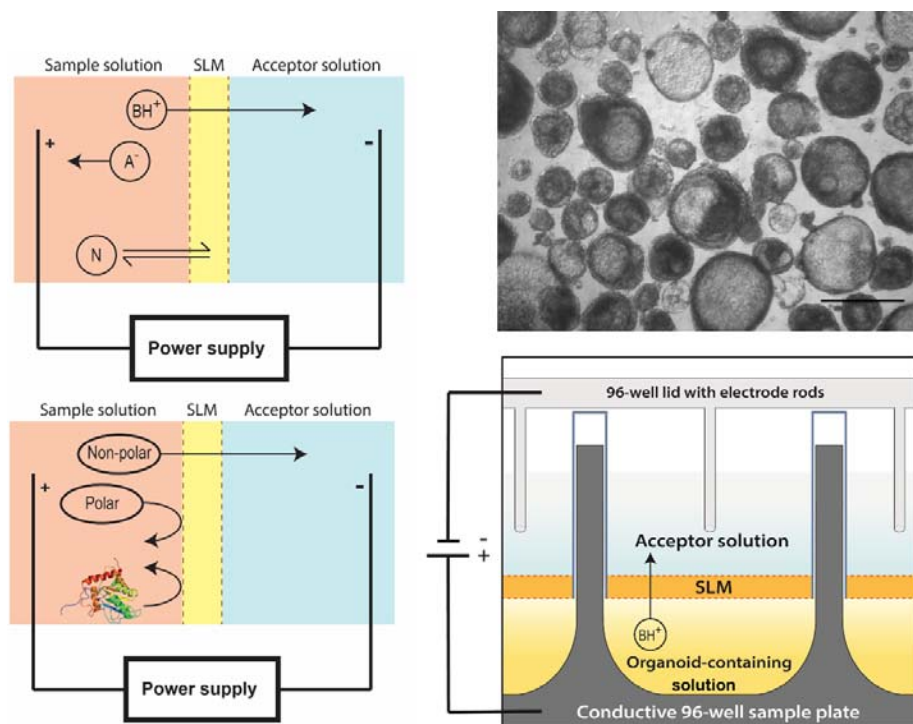

84

85 **Figure 1.** Left: EME principle. Charged analytes migrate from the sample solution across the  
86 supported liquid membrane (SLM) and into the acceptor solution. Extraction selectivity is obtained by  
87 voltage polarity and partitioning into and through the SLM. Polar molecules and macromolecules are  
88 effectively discriminated from extraction by the hydrophobic SLM. Upper right: Light microscope  
89 picture of iPSC derived liver organoids used in this study, scale bar 500  $\mu$ m. Lower right: 96-well-  
90 format EME illustration.

91

## 92 **Experimental**

93

### 94 **Chemicals and materials**

95 2-Nitrophenyl octyl ether (NPOE), 2-nitrophenyl pentyl ether (NPPE), bis(2-  
96 ethylhexyl) hydrogen phosphite (DEHPi), bis(2-ethylhexyl) phosphate (DEHP),  
97 sodium hydroxide, ammonium formate (>99%), formic acid (FA, reagent grade 95%),  
98 were purchased from Sigma Aldrich (St. Louis, MO, USA). Ammonium hydroxide and  
99 acetonitrile (ACN, LC-MS grade) were purchased from VWR (Radnor, PA, US).  
100 Chromasolv methanol (LC-MS grade) was from Honeywell Riedel-de Haën (Seelze,  
101 Germany). Heroin HCl, 6-monoacetylmorphine (6-MAM) HCl and morphine were  
102 purchased from Lipomed AG (Arlesheim, Switzerland). Heroin-d9, 6-MAM-d6 and  
103 morphine-d3 were purchased from Cerilliant (Austin, TX, USA). Unless otherwise  
104 stated, the water used was type 1 water purified by a Direct-Q® water purification  
105 system from Millipore (Billerica, MA, USA).

106

## 107 **Organoids**

108 iPSC line AG27 was differentiated to form liver organoids as described by Harrison et  
109 al. (manuscript in preparation). iPSC cell lines HPSI1213i-babk\_2 and HPSI0114i-  
110 vabj\_3 were differentiated toward liver organoids using media from protocol by Ang  
111 et al.<sup>19</sup>, with modifications by Aizenshtadt et al. (manuscript in preparation). After 20  
112 days differentiation, 50-60 organoids per well were treated with 10 or 50  $\mu$ M heroin in  
113 cell medium for 1, 3, 6, and 24 hours respectively (n=3), in separate 96-well plates.  
114 Heroin HCl was first dissolved in 0.9% NaCl prior to dilution in cell medium.  
115 Metabolism was stopped by adding FA to a final concentration of 0.11 M, and the  
116 plates were frozen at -80 °C. In parallel, cell medium free from organoids (n=3) were  
117 used as drug degradation control samples.

118

## 119 **EME-set-up**

120 The extraction setup and procedure have previously been described by Restan et al.  
121 <sup>16</sup>. Prior to the extraction, 50  $\mu$ L of the heroin-exposed liver organoid samples  
122 (containing 0.11 M FA) was added to 40  $\mu$ L water and 10  $\mu$ L of the internal standard  
123 solution containing morphine-d3, 6-MAM-d6 and heroin-d9, each at 1.5  $\mu$ M. The  
124 samples were then loaded into the wells of an in-house built 96-well stainless-steel  
125 plate. Prior to this, 3  $\mu$ L DEHP/NPOE (10/90, w/w) was immobilized into the  
126 membrane pores (polyvinylidene fluoride, PVDF, 0.45  $\mu$ m pore size) of a 96-well  
127 MultiScreen-IP filter plate from Merck Millipore Ltd. (Carrigtwohill, Ireland). The steel  
128 and filter plates were subsequently clamped together and 100  $\mu$ L 10 mM ammonium  
129 formate pH 3.1 was loaded into each well of the filter plate, and thus constituting the  
130 acceptor solution. A conductive in-house built aluminum lid with 96 electrode rods  
131 was placed onto the filter plate, and the whole construct was placed on a shaking  
132 board. The steel plate holding the organoid solution was connected to the anode of  
133 an external power supply, while the acceptor electrode lid was connected to the  
134 cathode. Simultaneous extraction of all samples was performed for 15 minutes, at  
135 900 rpm agitation, with 30 V applied for the first two minutes and 50 V applied for the  
136 remaining extraction duration.

137

138

139

## 140 **UHPLC-MS**

141 Determination of heroin, 6-MAM and morphine was performed using UHPLC-MS  
142 based on a previously described method<sup>20</sup>. The sample extracts were analyzed  
143 using an Acquity™ UHPLC pump coupled to a Xevo TQ (triple quadrupole) MS with  
144 and electrospray ionization interface, all from Waters (Milford, MA, USA). Separation  
145 was achieved using the Acquity UPLC® HSS T3 C18 column (2.1 x 100 mm, 1.8 µm  
146 particles). Solvent A consisted of 10 mM ammonium formate buffer pH 3.1 and  
147 solvent B consisted of methanol. The sample injection volume was set to 7.5 µL, and  
148 the gradient elution was carried out at a flow rate of 0.5 mL/min at 65°C. MS-  
149 detection was performed in positive mode using multiple reaction monitoring. Data  
150 was acquired and processed using MassLynx 4.1 software (Waters).

151

## 152 **Capillary electrophoresis**

153 The CE separations with data handling were carried out using a 7100 CE instrument  
154 equipped with an on-column diode-array detector and a CE Chemstation software  
155 from Agilent Technologies (Waldbronn, Germany). Separations were performed  
156 using fused-silica capillaries from PolymicroTechnologies (Phoenix, AZ, USA), with  
157  $L_{\text{tot}} = 59$  cm and  $L_{\text{eff}} = 51$  cm, 75 µm ID and 360 µm outer diameter (OD). The  
158 background electrolyte (BGE) consisted of 30 mM ammonium formate pH 8. Before  
159 each injection, the capillary was rinsed at a pressure of 1000 mbar with 0.1 M NaOH  
160 and water (0.5 min each), followed by the BGE (3 min). Injections were performed by  
161 stacking at 50 mbar: starting with diluted BGE (9 +1) for 3 s, followed by the sample  
162 injection (15 s, equivalent to around 107 nL) and the BGE (3 s). Separations and  
163 measurements were performed with an applied potential of +30 kV (25°C) and at an  
164 UV-absorbance of 214 nm.

165

## 166 **Results and Discussion**

167 In this study, analytical approaches were applied for liver organoid drug  
168 measurements. With the future objective of advancing to online analyses, EME was  
169 assessed for the clean-up of analytes from the organoid cell medium, a method  
170 previously shown to enable selective and fast extraction from complex matrices (and  
171 also on-chip)<sup>21</sup>.

172

## 173 EME of heroin and metabolites

174 For testing the potential of EME-MS for analysis of liver organoids, heroin was  
175 chosen as a model substance, due to its familiar phase I metabolism to 6-MAM and  
176 morphine in the liver (**Figure 2**). Therefore, multi-well EME conditions focusing on  
177 these three compounds were assessed. Best recovery and repeatability for both  
178 standard solution and spiked cell medium samples were obtained using an EME  
179 system comprising 10 % (w/w) DEHP/NPOE as SLM, an extraction time of 15  
180 minutes, and an extraction voltage of 50 V. With these parameters, the extraction  
181 current was <50  $\mu$ A per well throughout the extraction. For increasing accuracy,  
182 correction for non-exhaustive extractions was done by spiking samples with  
183 isotopically labelled internal standards prior to extraction.

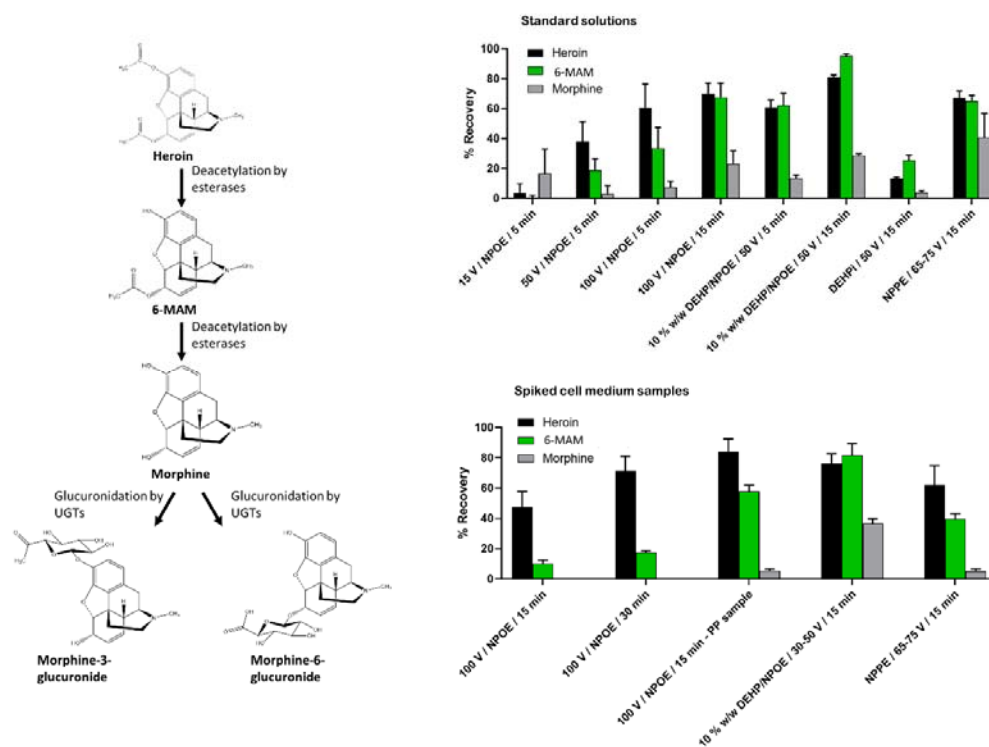

184

185 **Figure 2.** Left: Illustration of well-documented metabolites of heroin metabolism in the liver. In phase I  
186 metabolism, heroin is converted to 6-MAM and morphine, while familiar phase II metabolites are  
187 morphine glucuronides. Right: Analyte recovery (%) of multi-well EME under varying conditions, with  
188 standard solutions and spiked cell medium samples using CE-UV.

189

190

191

192

## 193 EME of organoids

194 Samples containing 50-60 liver organoids per well were exposed to 10  $\mu$ M heroin.

195 The extraction of analytes with EME was associated with satisfactory well-to-well



196 repeatability, see **Figure 3**. Heroin levels decreased with time to 6-MAM (both  
197 enzymatic and non-enzymatic), and with subsequent enzymatic metabolism to  
198 morphine, adding to the confirmation that the liver organoids had traits related to  
199 human livers (see **Figure S-1** for control samples). These trends were also similar to  
200 that observed with non-EME approaches, e.g. more manual sample preparation  
201 including centrifugation steps (tested with two organoid iPSC sources, **Figure S-2**).  
202 In accordance, using mass spectrometry-based proteomics, we could confirm a clear  
203 presence of the key liver enzymes human carboxyl esterases 1 and 2 (hCES1 and  
204 hCES2) in the organoids (see **Figure S-3**). However, the kinetics were (expectedly)  
205 substantially slower than that observed with e.g. microsomes and S9-fraction, see  
206 **Figure S-4**; it can therefore be speculated that direct measurements of drug  
207 metabolism can provide valuable insight when optimizing organoid development  
208 protocols. Although EME and MS are compatible with phase I metabolism  
209 monitoring, we were not able to observe phase II metabolites M3G/M6G. A key  
210 reason is a weakness of EME, that highly polar compounds have low recovery; this  
211 can in many cases be fine-tuned<sup>22,23</sup>.

212

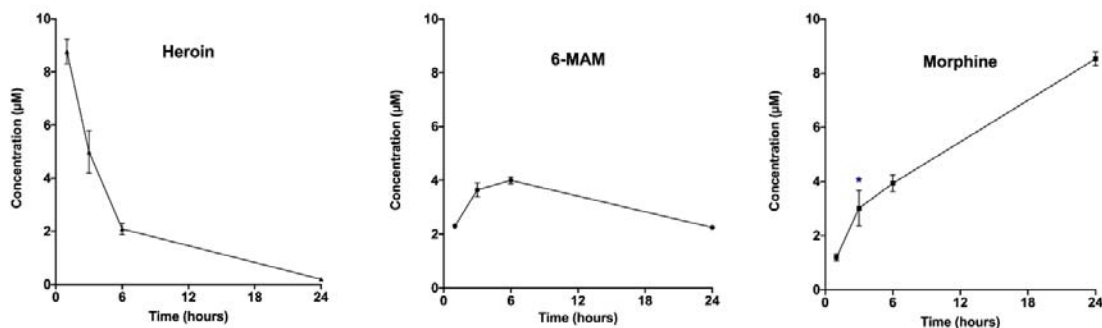

213

214 **Figure 3.** Liver organoid drug metabolism using multi-well EME and UHPLC-MS, studied with 50-60  
215 organoids per well (n=3) for 1, 3, 6 and 24 hours. The asterisk indicates the removal of one data point  
216 due to poor internal standard signal.

217

218

219

220

### 221 **Organoid EME extracts compatibility with various separation techniques**

222 The organoid EME extracts were analyzed using UHPLC-MS instrumentation, which  
223 provided high resolution separations within 7 minutes. We have also investigated  
224 other separation approaches that can be compatible with small samples and online



225 action. NanoLC, a sensitive approach which has been mostly associated with  
226 proteomics in recent years, was seen to provide attogram detections some small  
227 molecule analytes such as heroin (results not shown). However, poor robustness  
228 was associated with nanoLC-MS analysis of more polar analytes, e.g. morphine. This  
229 was the case for both on-column injection and SPE-nanoLC. We also examined self-  
230 packed nano RPLC columns which were more compatible with highly aqueous  
231 mobile phases, but breakthrough/poor retention time repeatability was still an issue.  
232 Capillary electrophoresis, perhaps the most “chip-ready” of the techniques  
233 investigated, was capable of fast analysis of organoid EME extracts, here also  
234 demonstrated with simple UV detection (**Figure 4**). However, organoid incubation in  
235 50  $\mu$ M heroin was needed in order to achieve detection with CE-UV.

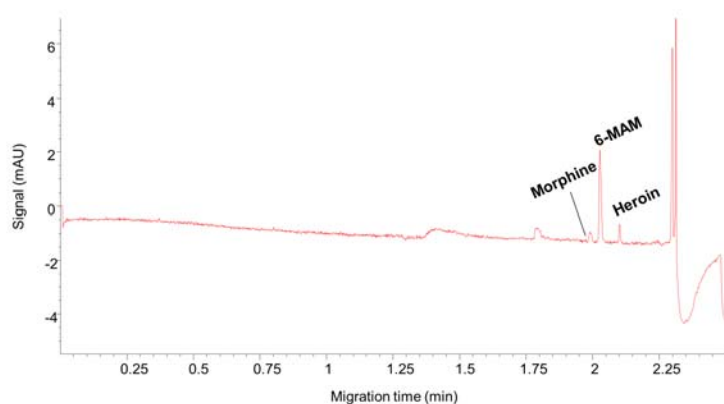

236  
237 **Figure 4.** Electropherogram of the organoids' analytes using simple CE-UV.  
238  
239

## 240 Conclusions

241 EME-MS is a promising concept for organoid analysis, here demonstrated for drug  
242 metabolism measurements. Following this proof-of-concept study, we will continue to  
243 develop EME and organoid analysis; a natural next step will be nanoliter-scale online  
244 EME-LC-MS of organoid samples. Related systems have been demonstrated with  
245 microsomes<sup>18</sup>, but with larger separation columns, and arguably not suited for trace  
246 samples. Due to challenges with nanoLC, we will instead likely investigate the use of  
247 capillary LC or microbore LC, as a compromise between sensitivity and robustness.  
248 Disadvantages of the current EME settings are poor recovery of more polar  
249 metabolites. We are currently fine-tuning membrane solvents suited for such  
250 analytes.

251

## 252 Acknowledgements

253 This work was supported by the Research Council of Norway through its Centre of  
254 Excellence scheme, project number 262613. The work was also supported by the  
255 Olav Thon Foundation. Financial support from UiO:Life Science is also gratefully  
256 acknowledged. Technical assistance by Elisabeth Nerem (Department of Forensic  
257 Sciences, Oslo University Hospital, Oslo, Norway) was greatly appreciated.

258

## 259 References

- 260 (1) Lancaster, M. A.; Knoblich, J. A. *Science* **2014**, *345* (6194), 1247125.  
261 (2) Clevers, H. *Cell* **2016**, *165* (7), 1586-1597.  
262 (3) Rossi, G.; Manfrin, A.; Lutolf, M. P. *Nat. Rev. Genet.* **2018**, *19* (11), 671-687.  
263 (4) Pampaloni, F.; Reynaud, E. G.; Stelzer, E. H. K. *Nat. Rev. Mol. Cell Biol.* **2007**, *8* (10),  
264 839-845.  
265 (5) Westmoreland, C.; Holmes, A. M. *Organogenesis* **2009**, *5* (2), 67-72.  
266 (6) Lancaster, M. A.; Renner, M.; Martin, C.-A.; Wenzel, D.; Bicknell, L. S.; Hurles, M. E.;  
267 Homfray, T.; Penninger, J. M.; Jackson, A. P.; Knoblich, J. A. *Nature* **2013**, *501* (7467), 373-  
268 379.  
269 (7) Stevens, K. R.; Kreuziger, K. L.; Dupras, S. K.; Korte, F. S.; Regnier, M.; Muskheli, V.;  
270 Nourse, M. B.; Bendixen, K.; Reinecke, H.; Murry, C. E. *Proc. Natl. Acad. Sci. U. S. A.* **2009**,  
271 *106* (39), 16568-16573.  
272 (8) van de Wetering, M.; Francies, Hayley E.; Francis, Joshua M.; Bounova, G.; Iorio, F.;  
273 Pronk, A.; van Houdt, W.; van Gorp, J.; Taylor-Weiner, A.; Kester, L.; McLaren-Douglas, A.;  
274 Blokker, J.; Jaksani, S.; Bartfeld, S.; Volckman, R.; van Sluis, P.; Li, Vivian S. W.; Seepo, S.;  
275 Sekhar Pedamallu, C.; Cibulskis, K., et al. *Cell* **2015**, *161* (4), 933-945.  
276 (9) Huch, M.; Dorrell, C.; Boj, S. F.; van Es, J. H.; Li, V. S. W.; van de Wetering, M.; Sato,  
277 T.; Hamer, K.; Sasaki, N.; Finegold, M. J.; Haft, A.; Vries, R. G.; Grompe, M.; Clevers, H.  
278 *Nature* **2013**, *494* (7436), 247-250.  
279 (10) Lin, A.; Sved Skottvoll, F.; Rayner, S.; Pedersen-Bjergaard, S.; Sullivan, G.; Krauss, S.;  
280 Ray Wilson, S.; Harrison, S. *Electrophoresis* **2020**, *41* (1-2), 56-64.  
281 (11) Pedersen-Bjergaard, S.; Rasmussen, K. E. *J. Chromatogr. A* **2006**, *1109* (2), 183-190.  
282 (12) Drouin, N.; Kubáň, P.; Rudaz, S.; Pedersen-Bjergaard, S.; Schappler, J. *TrAC, Trends*  
283 *Anal. Chem.* **2019**, *113*, 357-363.  
284 (13) Gjelstad, A.; Rasmussen, K. E.; Pedersen-Bjergaard, S. *Anal. Bioanal. Chem.* **2009**, *393*  
285 (3), 921-928.  
286 (14) Eibak, L. E. E.; Rasmussen, K. E.; Øiestad, E. L.; Pedersen-Bjergaard, S.; Gjelstad, A.  
287 *Anal. Chim. Acta* **2014**, *828*, 46-52.  
288 (15) Drouin, N.; Mandscheff, J.-F.; Rudaz, S.; Schappler, J. *Anal. Chem.* **2017**, *89* (12), 6346-  
289 6350.  
290 (16) Restan, M. S.; Pedersen, M. E.; Jensen, H.; Pedersen-Bjergaard, S. *Anal. Chem.* **2019**, *91*  
291 (10), 6702-6708.  
292 (17) Petersen, N. J.; Jensen, H.; Hansen, S. H.; Foss, S. T.; Snakenborg, D.; Pedersen-  
293 Bjergaard, S. *Microfluid. Nanofluid.* **2010**, *9* (4), 881-888.

- 294 (18) Hansen, F. A.; Sticker, D.; Kutter, J. P.; Petersen, N. J.; Pedersen-Bjergaard, S. *Anal.*  
295 *Chem.* **2018**, *90* (15), 9322-9329.
- 296 (19) Ang, Lay Teng, et al. *Cell Rep.* **2018**, *22* (8), 2190-2205.
- 297 (20) Karinen, R.; Andersen, J. M.; Ripel, Å.; Hasvold, I.; Hopen, A. B.; Mørland, J.;  
298 Christophersen, A. S. *J. Anal. Toxicol.* **2009**, *33* (7), 345-350.
- 299 (21) Pedersen-Bjergaard, S. *Anal. Bioanal. Chem.* **2019**, *411* (9), 1687-1693.
- 300 (22) Drouin, N.; Rudaz, S.; Schappler, J. *J. Pharm. Biomed. Anal.* **2018**, *159*, 53-59.
- 301 (23) Román-Hidalgo, C.; Martín-Valero, M. J.; Fernández-Torres, R.; Callejón-Mochón, M.;  
302 Bello-López, M. Á. *Talanta* **2017**, *162*, 32-37.
- 303 (24) Wilson, S. R.; Vehus, T.; Berg, H. S.; Lundanes, E. *Bioanalysis* **2015**, *7* (14), 1799-1815.
